# Supplementary material for: Assessing climbers’ pull-up capabilities by differentiating the parameters involved in power production
Source: PeerJ. 2023 Sep 26;11:e15886. doi: 10.7717/peerj.15886 (PMC10540777; doi:10.7717/peerj.15886)
Supplement: Supplemental Information 1 [file peerj-11-15886-s001.xlsx]

## Sheet: Mean Results
Mean results of Jump tests
	Fmean (N/kg)	Fmax (N/kg)	SD Fmax	Tfmax (%cycle)	Pmean (W/kg)	SD Pmean	Pmax (W/kg)	SD Pmax	Tpmax (%cycle)	Vmean (m/s)	Vmax (m/s)	Tvmax (%cycle)	Fopt (N/kg)	Vopt (m/s)	Amplitude (m)	pmax (m)		Up phase duration	SD
strict	9.73105	13.2148	0.86	31.2772	6.64477	0.97	13.6624	2.88	65.28	0.691239	1.26567		10.99	1.2	0.7	0.7		0.998358	0.21
Normal	9.74084	15.1335	2.62	30.7671	7.23367	1.32	16.0434	4.7	51.28	0.754637	1.37895		12.2	1.22	0.71	0.71		0.952713	0.21
Plyometrics	9.65699	16.714	1.26	-1.06897	8.11479	1.35	14.9573	3.94	40.56	0.758921	1.2297		11.92	1.18	0.59	0.26	(départ 90°)	0.706381	0.14
		Fmax (montée)
		12.49
		13.57
		15.62
Mean results of incremental pull-ups test														Force (N/kg) en fonction du cycle de traction (%)						Puissance (W/kg) en fonction du cycle de traction (%)
	Mean	SD	Min	Max
Slope of F-V relationship	11.2255	3.25	6.38255	21.198
F0	17.9456	2.98	11.9359	26.3571
V0	1.64406	0.23	1.24338	2.06111
R²	0.982692	0.008	0.940658	0.998758
Mean results of maximal number of pullups test
Maximal number of executed pull-ups tractions (Mean + sd) :			22.7586	7.59537
Mechanical work (J) :			8167.76	2816.97
																	beginning of the up phase = V>0
																	0 - 100% = before the up-phase
																	100 - 200% =up phase

## Sheet: Jump Tests
Participant	Mean Force (N/kg)			Maximal Force (N/kg)			Time of the maximal force pic (%cycle)			Mean Power (W/kg)			Maximal Power (W/kg)			Time of maximal peak power (%cycle)			Mean Velocity (m/s)			Maximal Velocity (m/s)			Duration of ascent phase (s)
	stricte	coordo	plio	stricte	coordo	plio	stricte	coordo	plio	stricte	coordo	plio	stricte	coordo	plio	stricte	coordo	plio	stricte	coordo	plio	stricte	coordo	plio	stricte	coordo	plio
S01	9.651	9.79954	9.68177	13.3971	12.4689	16.0335	22	54	-2	6.90094	6.29673	7.79069	11.8705	13.3153	12.1418	73	77	41	0.719185	0.641861	0.773631	1.17365	1.30557	1.13298	1.02083	1.27083	0.8125
S02	9.75332	9.75585	9.72968	14.2195	14.3074	18.1871	20	21	-6	8.03617	8.0319	7.52156	15.5575	15.0295	14.0368	65	57	54	0.840544	0.785782	0.683208	1.44398	1.35743	1.20143	1	0.979167	1.02083
S03	9.76044	9.6873	9.81567	12.2361	12.4842	14.361	19	17	1	6.19675	6.83504	7.54973	12.1064	12.8131	12.1528	71	61	55	0.648508	0.695964	0.754231	1.16666	1.22704	1.15295	0.9375	0.979167	0.729167
S04	9.79904	9.73056	9.84359	12.8155	12.8823	17.5106	55	19	-3	6.4302	6.75425	7.32082	13.8166	14.7924	12.6444	65	58	40	0.667039	0.688169	0.713235	1.24135	1.30991	1.13768	0.979167	1.02083	0.833333
S05	9.61846	9.77785	9.29236	15.0525	18.1661	18.3287	42	51	-11	7.34358	8.30341	11.1924	18.357	26.6093	27.2942	60	58	38	0.761784	0.84638	0.982696	1.55038	1.89378	1.80261	0.770833	0.75	0.583333
S06	9.75878	9.86639	9.81574	12.1991	16.5409	14.8472	18	17	-11	6.60288	7.07812	6.66217	11.7371	13.8912	10.2486	64	25	45	0.679462	0.803698	0.65507	1.1496	1.2461	0.988756	1.16667	1.04167	0.958333
S07	9.66743	9.78685	9.6118	13.2217	14.7107	18.5298	37	34	-3	6.02592	7.04453	8.05621	12.9738	13.4305	12.7841	57	47	40	0.651876	0.718067	0.723742	1.23063	1.2582	1.1135	0.895833	0.916667	0.6875
S08	9.76942	9.57449	9.68022	12.1198	16.7807	17.3843	55	28	17	6.13302	6.96465	7.62116	12.6306	16.2752	16.3616	64	37	30	0.616019	0.705716	0.723937	1.14329	1.29318	1.21733	1.02083	0.770833	0.5625
S09	9.79357	10.0238	9.24016	13.7285	21.3587	17.5861	28	28	27	7.67924	10.8468	10.5488	15.6489	28.4553	23.5277	64	39	40	0.779704	1.24713	0.97575	1.4206	2.11264	1.68883	0.833333	0.625	0.583333
S10	9.63386	9.99727	9.66103	13.1553	19.0555	15.7557	18	23	1	7.57702	8.20575	8.96916	16.4217	18.174	14.429	64	34	55	0.766033	1.0812	0.832646	1.42851	1.6715	1.26968	0.895833	0.770833	0.729167
S11	9.73334	9.6439	9.47279	13.9371	17.2433	16.061	18	41	-7	7.5169	7.20492	8.50984	15.2896	18.7196	16.6912	69	48	46	0.77164	0.733223	0.776334	1.37588	1.4476	1.32178	0.958333	0.854167	0.645833
S12	9.67692	9.71467	9.71547	12.6452	12.9474	16.7322	18	52	-6	6.77304	6.05122	7.28471	12.4454	13.5601	11.3998	54	58	36	0.71236	0.616308	0.663545	1.19749	1.212	0.995443	1.125	1.125	0.75
S13	9.67944	9.64993	9.7453	13.7229	14.9099	15.686	23	28	-3	7.82524	8.57472	9.09065	16.4436	16.1368	15.7951	60	54	53	0.826393	0.766503	0.862642	1.49567	1.37068	1.37187	0.854167	0.770833	0.6875
S15	9.62497	9.97235	9.8078	14.5097	21.0023	17.3709	18	24	11	6.59126	9.42867	8.58247	10.7486	25.0588	15.0839	60	33	26	0.710436	1.17575	0.81141	1.07995	1.94184	1.17531	0.875	0.729167	0.625
S16	9.60782	9.61816	9.65723	13.6239	13.3202	18.0338	31	18	-9	7.53613	8.22622	9.31104	14.1439	15.4564	16.2132	69	53	38	0.776628	0.836657	0.842306	1.36162	1.45554	1.3176	0.958333	0.979167	0.666667
S17	9.75203	9.62442	9.59559	12.7549	12.4973	16.0727	27	33	-19	6.07356	5.90376	7.09029	11.0944	12.2145	13.3035	75	75	43	0.648741	0.599848	0.681154	1.1	1.14914	1.13969	1.02083	1.10417	0.645833
S18	9.80966	9.76557	9.77168	13.4217	15.5232	15.7586	13	14	-8	5.26458	6.03193	6.51089	8.92969	10.8732	11.9251	55	20	44	0.563807	0.614749	0.635192	0.904345	0.945953	1.07065	1.29167	1.20833	0.791667
S19	9.74687	9.71667	9.84159	12.2615	14.8275	16.3424	49	43	-10	6.83056	6.78199	7.54849	14.134	16.1456	17.2137	63	49	41	0.717574	0.690828	0.751709	1.32985	1.35543	1.38854	1.14583	1.125	0.854167
S20	9.52988	9.35336	9.77485	14.694	16.2523	16.3063	54	31	20	5.68855	9.4139	9.14707	19.0875	20.1066	17.6257	85	44	38	0.667141	0.810643	0.920508	1.58674	1.51919	1.46667	1	0.75	0.625
S21	9.75083	9.78904	9.5095	13.1988	15.2377	19.4455	45	54	-4	7.48574	6.92066	9.58112	15.8346	17.9287	16.9194	65	60	28	0.788571	0.705445	0.827441	1.45705	1.49319	1.28161	0.875	1.02083	0.583333
S22	9.69587	9.61024	9.50174	13.8222	14.2198	16.0459	48	36	-10	6.99368	7.96881	7.22873	16.3666	16.1539	13.3726	61	49	40	0.772147	0.810631	0.640429	1.4594	1.41373	1.08674	0.833333	0.791667	0.625
S23	9.79945	9.64069	9.70733	16.7548	17.1701	17.0062	44	48	-14	8.2013	8.57446	9.43462	22.065	23.8045	20.6605	56	54	44	0.856053	0.872662	0.858472	1.72728	1.83522	1.53314	0.770833	0.9375	0.645833
S24	9.72784	9.81247	9.6313	14.1662	13.9805	16.7454	31	33	16	6.92807	7.33967	8.94453	13.1629	13.2137	16.6698	68	66	30	0.743924	0.748182	0.861701	1.30966	1.28093	1.32967	0.979167	0.958333	0.6875
S25	9.77223	9.77648	9.61479	12.6228	12.1521	16.2548	55	46	-6	6.40643	5.73981	8.50264	12.6003	11.2561	15.3432	65	75	37	0.619172	0.585024	0.806665	1.14679	1.08122	1.28314	1.1875	1.22917	0.708333
S26	9.59111	9.66414	9.68709	15.9548	15.8527	16.2562	32	40	31	8.71371	8.56181	9.48112	20.5045	21.525	21.4506	53	54	45	0.926455	0.851202	0.905168	1.71659	1.72619	1.61702	0.729167	0.791667	0.604167
S27	9.76411	9.7648	9.73931	11.5536	13.224	14.8885	10	14	-7	3.23059	4.70393	4.70106	5.60626	8.93309	9.19429	69	25	23	0.340764	0.479342	0.402883	0.574605	0.833223	0.78651	1.8125	1.4375	1.08333
S28	9.77051	9.80589	9.67379	12.4177	12.6517	17.5827	22	21	-9	6.91292	6.87077	7.63872	13.8616	13.7033	11.6077	69	62	53	0.712478	0.700382	0.670964	1.30367	1.28439	1.02164	1.04167	1	0.75
S29	9.69339	9.70251	9.62022	13.2356	14.3417	16.6687	22	21	-7	6.03439	6.36792	7.40777	12.9122	9.9853	12.8279	70	64	43	0.602729	0.648509	0.730564	1.14868	0.987214	1.16048	0.895833	1.02083	0.645833
S30	9.80215	9.70056	9.58323	13.4338	12.2294	14.2987	18	20	0	8.01102	6.93892	7.15182	14.8292	14.3174	11.7359	68	71	63	0.815441	0.706686	0.659793	1.37606	1.3272	1.05625	1.04167	1.04167	0.770833
Mean	9.73105	9.74084	9.65699	13.2148	15.1335	16.714	31.2772	30.7671	-1.06897	6.64477	7.23367	8.11479	13.6624	16.0434	14.9573	64.8621	51.9655	41.6897	0.691239	0.754637	0.758921	1.26567	1.37895	1.2297	0.998358	0.952713	0.706381
SD	0.0572604	0.144902	0.156596	0.858138	2.62452	1.2552	15.2067	12.9458	12.3228	0.965901	1.32292	1.35448	2.88153	4.7005	3.94148	6.85422	15.1881	9.32395	0.0995691	0.180111	0.123709	0.216677	0.28778	0.216175	0.207296	0.208045	0.136746

## Sheet: Incremental Pull-u
Participants	Body mass	Maximal pulled weight (1RM)	Slope of Force-Velocity relationship	F0	V0	Maximal Theoritical Power	R²	Power to weight ratio
S01	80.8	106.8	8.94234	16.089	1.79919	7.3881	0.998758	0.0914369
S02	57.4	87.4	7.94718	16.38	2.06111	8.57259	0.998636	0.149348
S03	62	95	11.5493	17.2499	1.49359	6.41318	0.994832	0.103438
S04	68.5	103.5	10.761	17.1391	1.59271	6.70984	0.995235	0.0979538
S05	61.1	120.1	21.198	26.3571	1.24338	8.27799	0.940658	0.135483
S06	71.6	101.6	8.30404	15.4464	1.86011	7.01158	0.995015	0.0979272
S07	58	86	12.0284	18.0697	1.50225	6.6225	0.990612	0.114181
S08	69.9	90.9	8.60392	14.9849	1.74164	6.19577	0.980435	0.0886376
S09	78.1	134.1	13.7974	20.4912	1.48515	7.68328	0.983739	0.0983774
S10	73.2	122.2	11.268	18.3547	1.62893	7.52347	0.985335	0.10278
S11	56.5	101.5	12.3524	19.1562	1.55081	7.33012	0.971989	0.129737
S12	56.1	77.1	8.66267	15.6212	1.80327	7.61798	0.952325	0.135793
S13	66.2	111.2	11.6871	19.3434	1.6551	8.07576	0.992053	0.12199
S15	66.4	100.4	12.5488	18.4735	1.47214	7.02101	0.988752	0.105738
S16	70.9	114.9	11.4854	19.1182	1.66456	7.82537	0.976304	0.110372
S17	69.2	93.2	10.0321	15.9992	1.59479	9.54613	0.963379	0.13795
S18	63.6	83.6	10.236	15.7309	1.53682	5.55432	0.951886	0.0873321
S19	76.7	102.7	7.99993	15.436	1.92951	7.36896	0.998082	0.0960751
S20	66.2	118.2	18.3194	22.8371	1.24661	7.23465	0.99256	0.109285
S21	60.6	104.6	11.9797	19.3872	1.61833	7.71385	0.988599	0.127291
S22	63.8	108.8	13.1677	20.273	1.5396	7.72709	0.970969	0.121114
S23	61.1	111.1	13.5222	21.7772	1.61048	8.76797	0.983166	0.143502
S24	59.9	93.9	10.8556	17.8531	1.64459	7.18973	0.982706	0.120029
S25	67.7	94.7	8.55416	15.0663	1.76128	6.2934	0.982453	0.0929601
S26	66	121	15.0684	22.6514	1.50324	8.51259	0.973689	0.128979
S27	60	66	6.38255	11.9359	1.87009	9.47849	0.991959	0.157975
S28	72.3	106.3	9.26116	16.1389	1.74265	7.30045	0.995743	0.100974
S29	62.6	91.6	10.653	16.546	1.55318	6.42471	0.98228	0.102631
S30	74.4	105.4	8.37303	16.5168	1.97262	8.14538	0.995926	0.109481
Mean	66.2345	101.855	11.2255	17.9456	1.64406	7.50091	0.982692
Standard deviation	6.66924	14.6811	3.15568	2.95717	0.191463	0.942952	0.0150652

## Sheet: Nmax
Participant	Maximal number of pull-ups	Mechanical Work (J)
S01	12	5471
S02	20	5904
S03	25	8697
S04	18	6497
S05	40	9827
S06	14	5579
S07	12	3814
S08	16	5644
S09	36	16105
S10	27	11814
S11	33	8192
S12	20	6498
S13	23	8547
S15	21	7243
S16	23	9973
S17	22	5940
S18	18	6071
S19	19	9311
S20	31	12052
S21	21	7690
S22	34	10966
S23	33	12363
S24	26	9880
S25	26	8621
S26	28	9697
S27	12	3096
S28	18	7605
S29	15	5794
S30	17	7974
Mean	22.7586	8167.76
SD	7.59537	2816.97
